# Supplementary material for: CacyBP/SIP promotes tumor progression by regulating apoptosis and arresting the cell cycle in osteosarcoma
Source: PubMed Central journal article supplement — Exp Ther Med. 2020 Jun 5;20(2):1397–404. doi: 10.3892/etm.2020.8843 (PMC7388306; doi:10.3892/etm.2020.8843), 2020-06-05

Figure S1. Knockdown of CacyBP/SIP inhibits U2OS cell proliferation and colony formation *in vitro*. U2OS cells expressing either CacyBP/SIP-shRNA lentivirus or Ctrl lentivirus were seeded in 96-well plates and 6-well plates. (A and B) Colony formation assay and (C) MTT assay were performed to evaluate cell proliferation. Magnification, x100. \*P<0.05 and \*\*P<0.01. CacyBP/SIP, calcyclin-binding protein/Siah-1-interacting protein; sh, short hairpin; Ctrl, control; OD, optical density.

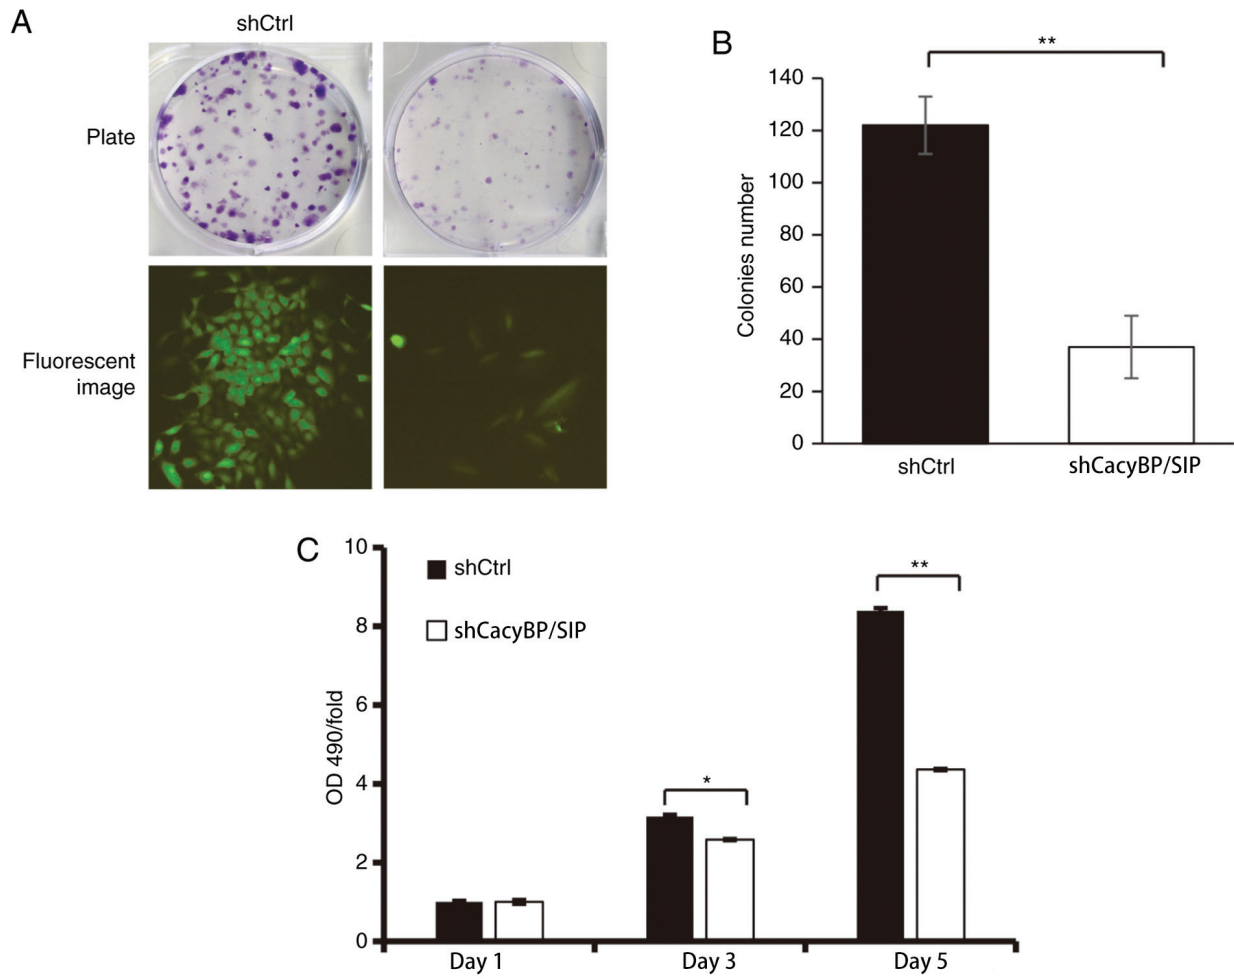

Supplement: Supplementary_Data.pdf [file Supplementary_Data.pdf]
